# RHEUMATOLOGY

VOLUME 45 SUPPLEMENT 2 JUNE 2006

## CONTENTS

### **First Latin American position paper on the pharmacological treatment of rheumatoid arthritis**

|                                                                                                                                                                                                                                                                                                                 |     |
|-----------------------------------------------------------------------------------------------------------------------------------------------------------------------------------------------------------------------------------------------------------------------------------------------------------------|-----|
| List of participants                                                                                                                                                                                                                                                                                            | ii5 |
| First Latin American position paper on the pharmacological treatment of<br>rheumatoid arthritis<br><i>By the Latin American Rheumatology Associations of the Pan-American<br/>League of Associations for Rheumatology (PANLAR) and the Grupo<br/>Latinoamericano de Estudio de Artritis Reumatoide (GLADAR)</i> | ii7 |
